# Supplementary material for: Climate and soil factors influencing seedling recruitment of plant species used for dryland restoration
Source: Copernicus journal article supplement (doi:10.5194/soil-2-287-2016), 2016-06-28
Supplement: Supplementary file 1 [file soil-2-287-2016-supplement.pdf]

Supplement of SOIL, 2, 287–298, 2016  
<http://www.soil-journal.net/2/287/2016/>  
doi:10.5194/soil-2-287-2016-supplement  
© Author(s) 2016. CC Attribution 3.0 License.

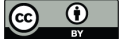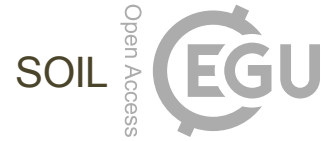

*Supplement of*

## **Climate and soil factors influencing seedling recruitment of plant species used for dryland restoration**

**M. Muñoz-Rojas et al.**

*Correspondence to:* Miriam Muñoz-Rojas ([miriammunozrojas@gmail.com](mailto:miriammunozrojas@gmail.com); [miriam.munoz-rojas@uwa.edu.au](mailto:miriam.munoz-rojas@uwa.edu.au))

The copyright of individual parts of the supplement might differ from the CC-BY 3.0 licence.

## Supplementary material

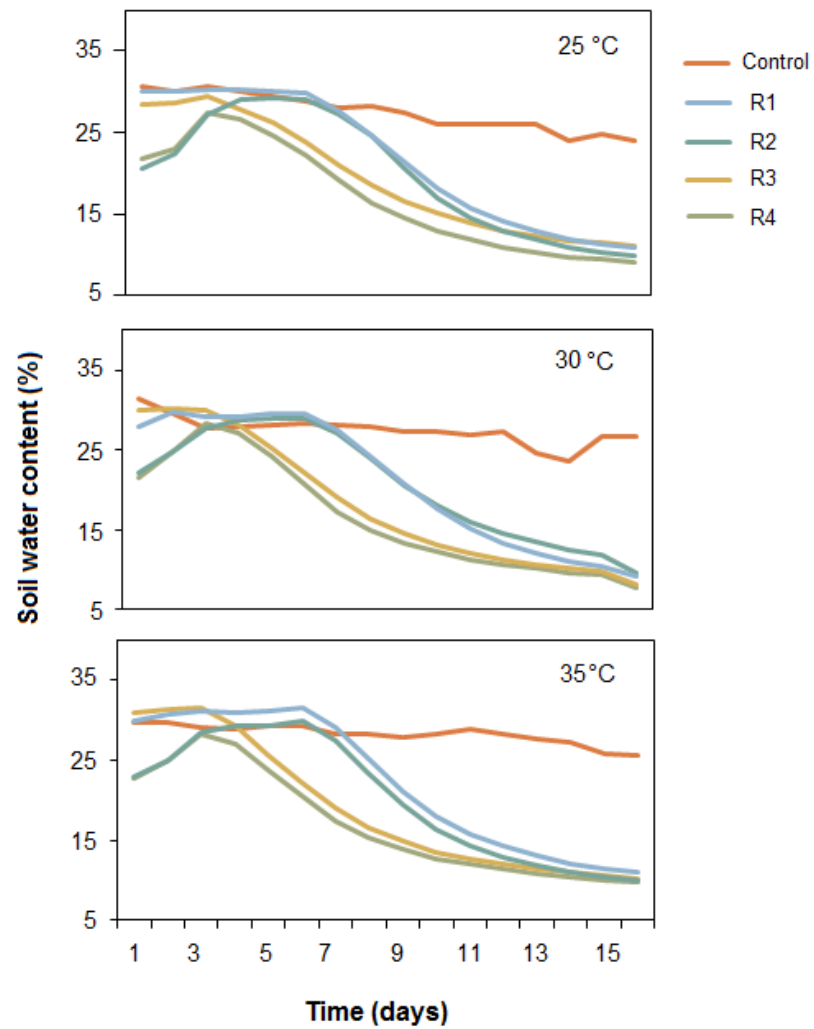

Figure S1. Variation in soil water content (%) with time (days) for climate scenarios ( $T= 25, 30$  and  $35$  °C). Watering treatments (control, R1, R2, R3 and R4) as described in Table 1.

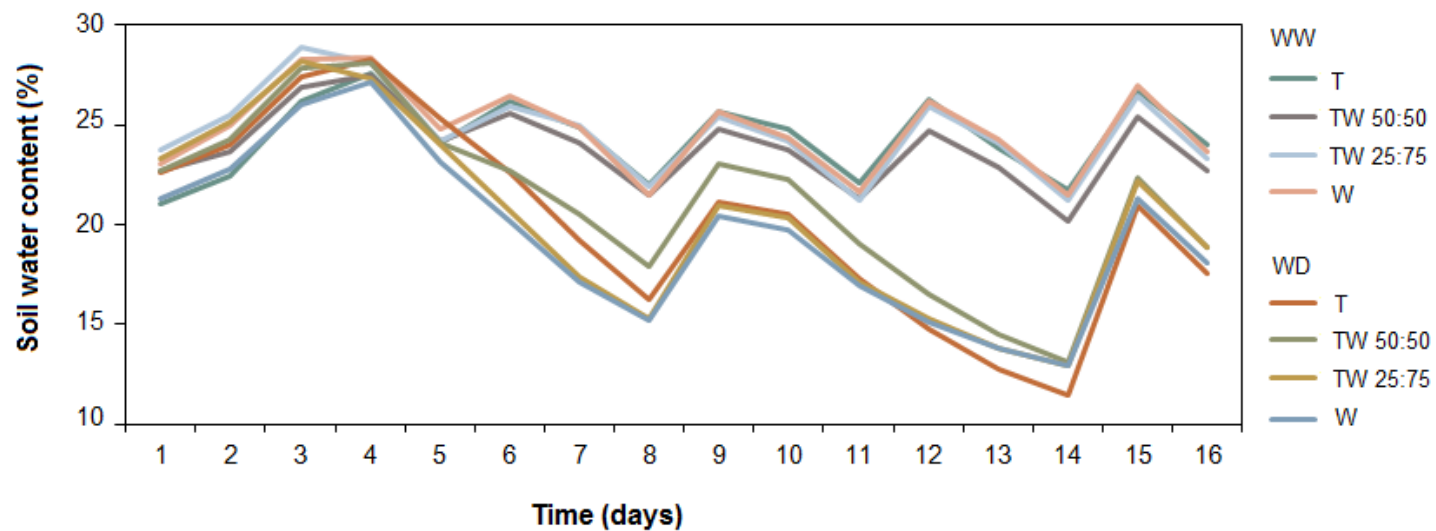

Figure S2. Variation in soil water content (%) with time (days) for different watering treatments (WW; well watered and WD: water deficit) and growth media types (T: 100% topsoil, TW 50:50: mix of topsoil and waste at 50:50 ratio, TW 25:75: mix of topsoil and waste at 75:25 ratio and W: 100% waste).
